# Supplementary material for: Comparative Genome Mapping Between Chinook Salmon (Oncorhynchus tshawytscha) and Rainbow Trout (O. mykiss) Based on Homologous Microsatellite Loci
Source: PubMed Central journal article supplement (PMC3852389; doi:10.1534/g3.113.008003), 2013-10-29
Supplement: supp_g3.113.008003_FigureS1.pdf [file supp_g3.113.008003_FigureS1.pdf]

### Ck01

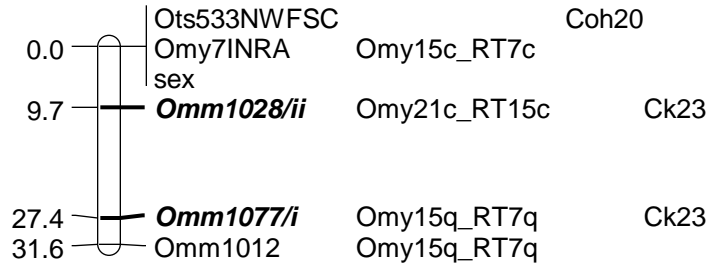

### Ck02

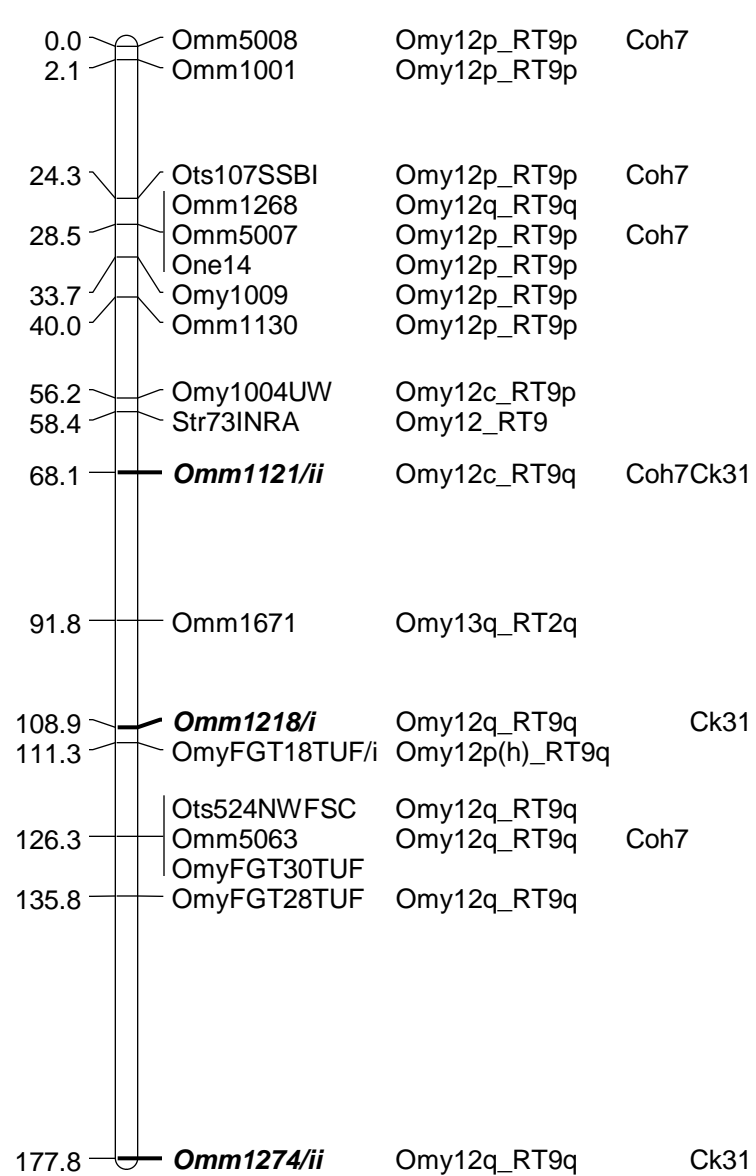

### Ck03

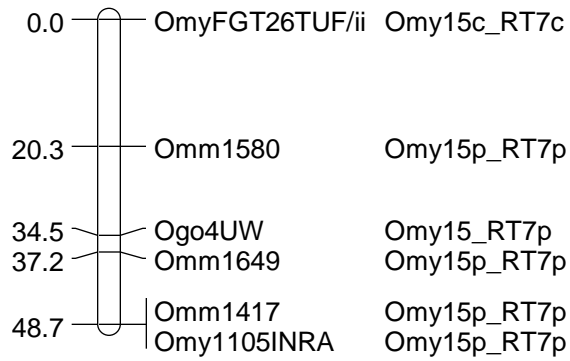

### Ck04

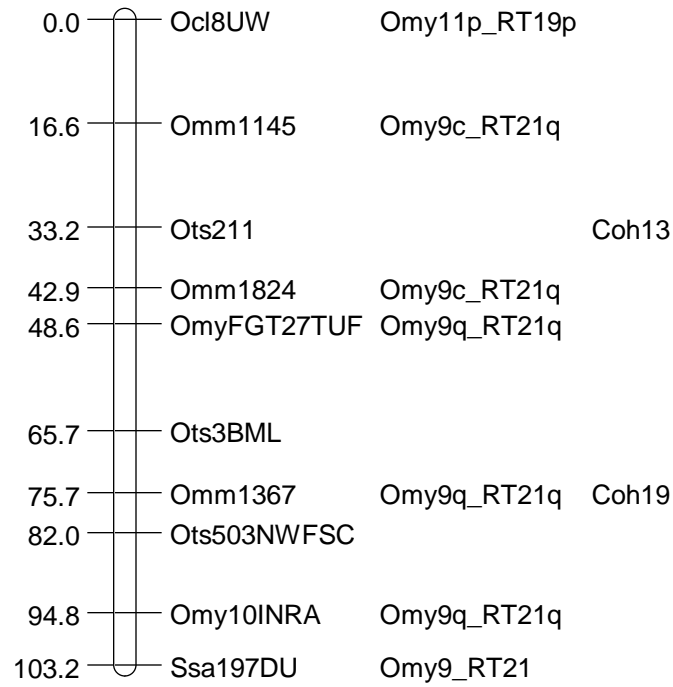

## Ck05

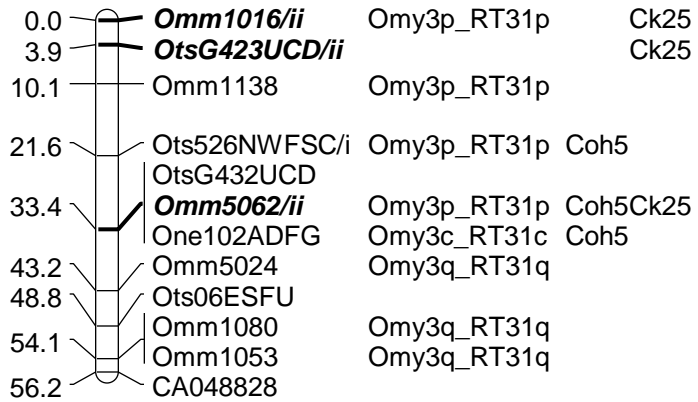

## Ck06

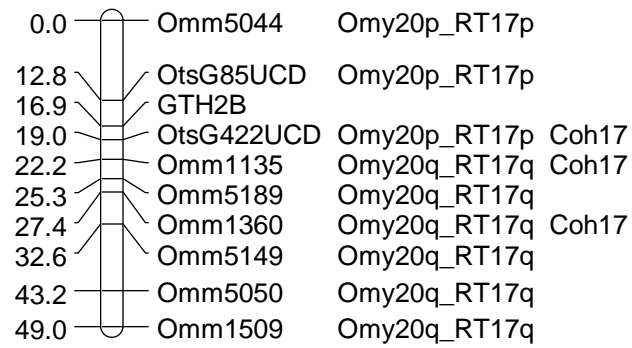

## Ck07

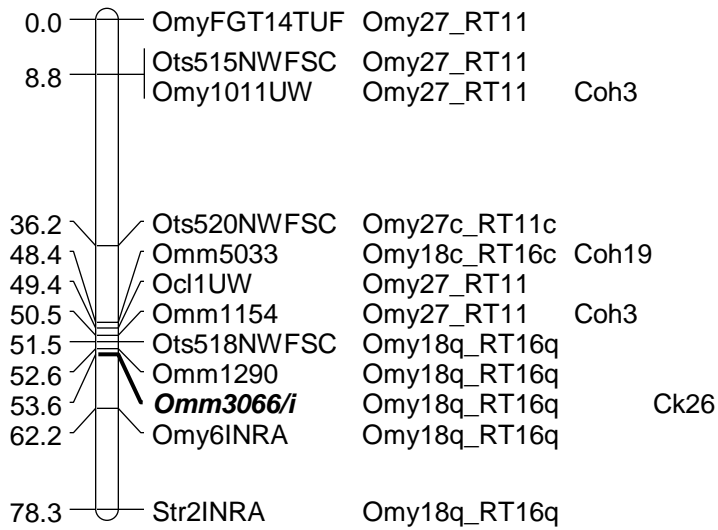

## Ck08

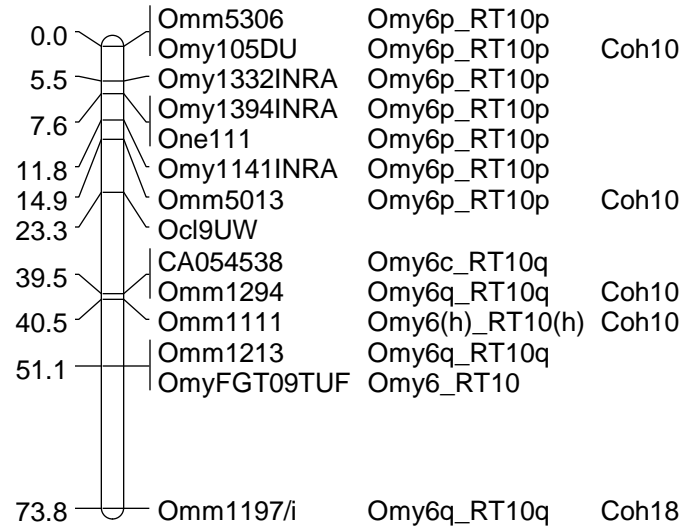

### Ck09

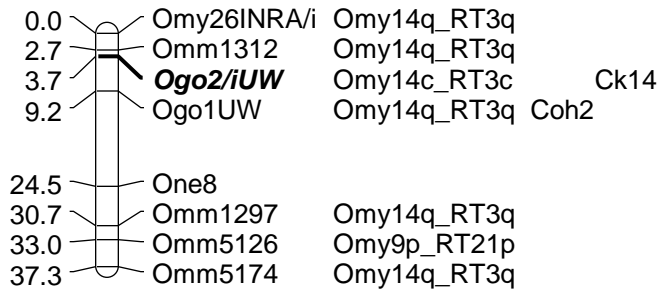

### Ck10

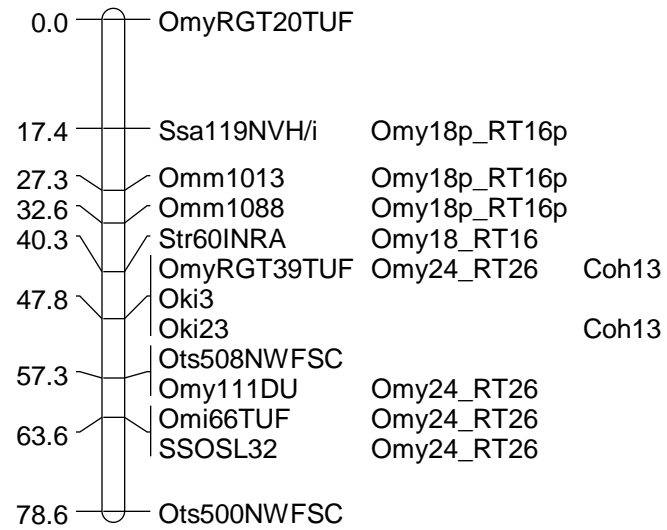

## Ck11

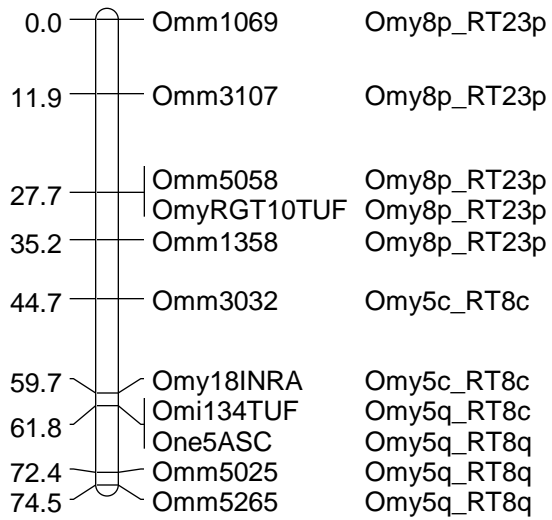

## Ck12

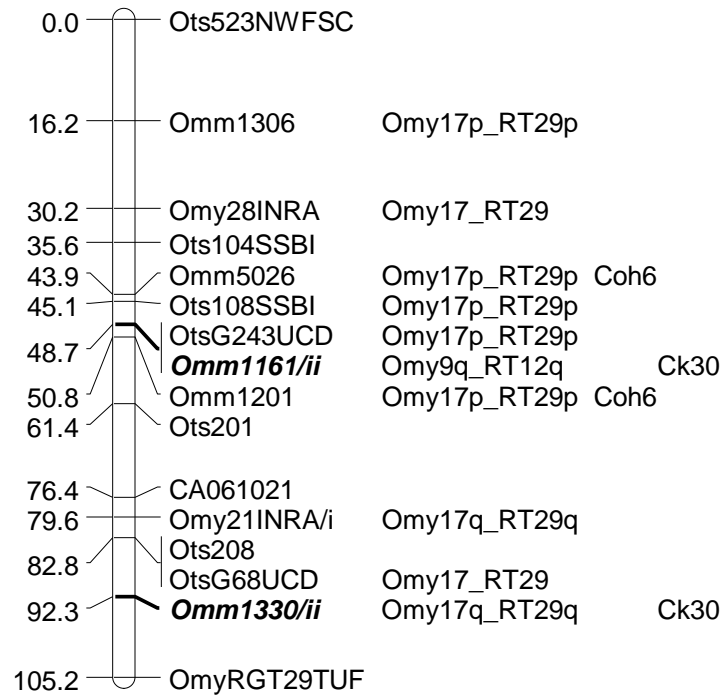

### Ck13

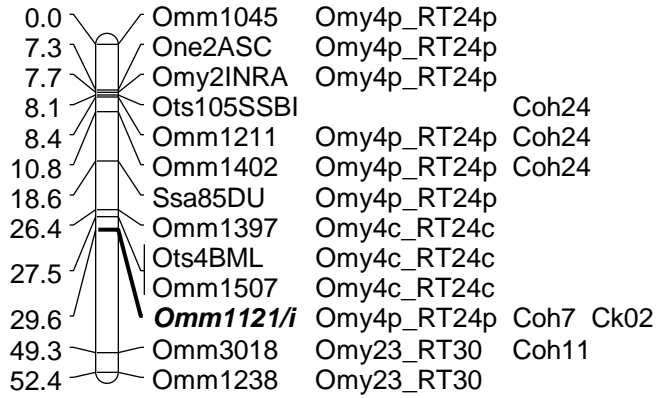

### Ck14

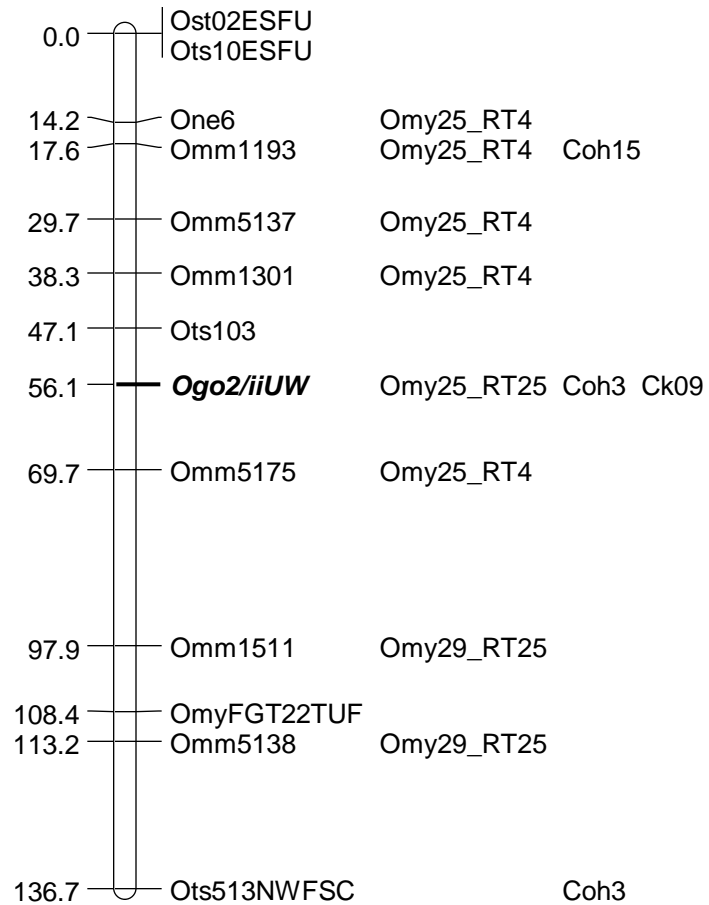

## Ck15

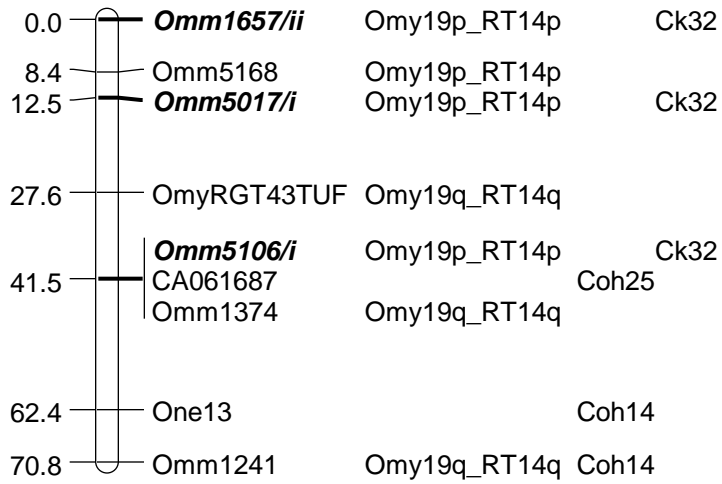

## Ck16

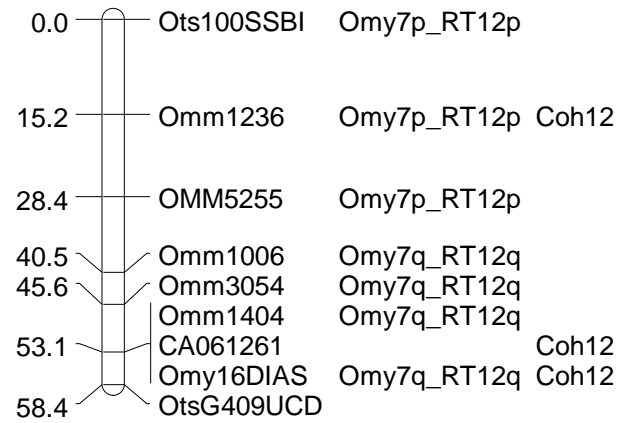



## Ck17

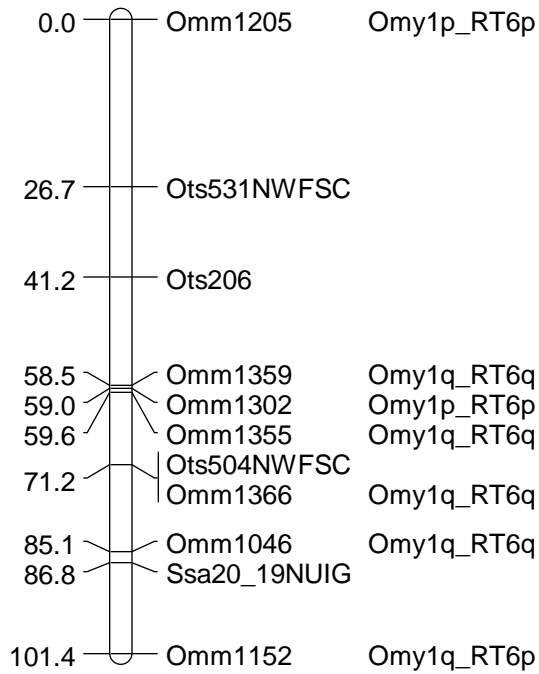

## Ck18

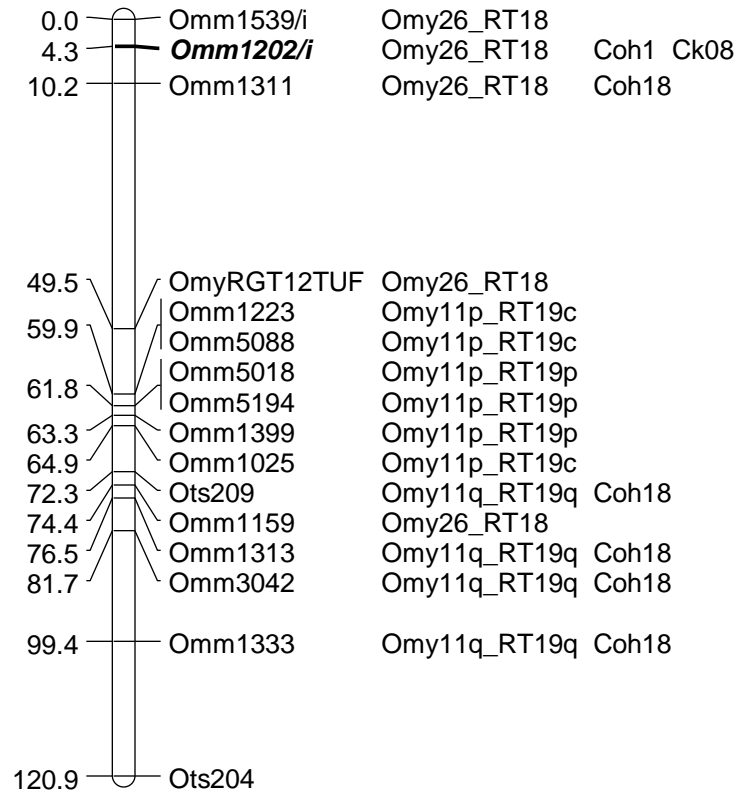

## Ck19

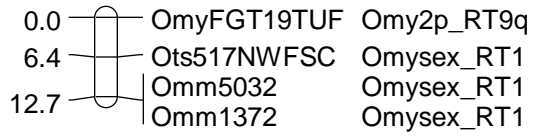

## Ck20

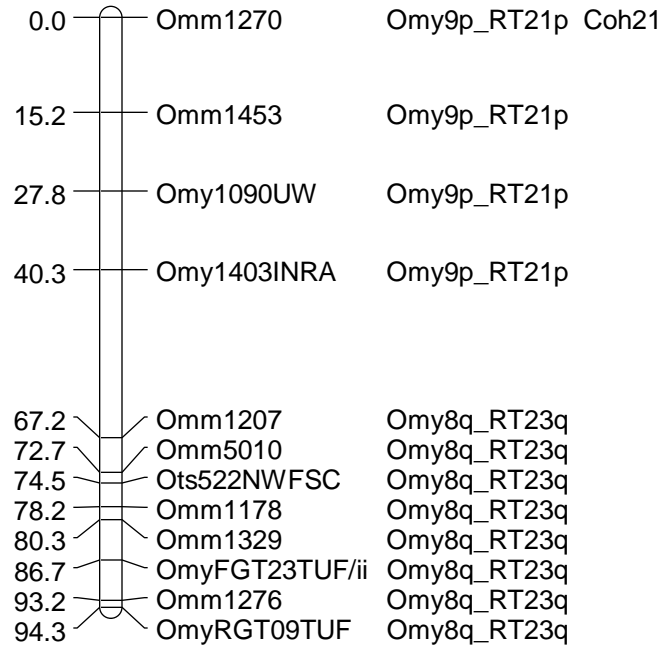

## Ck21

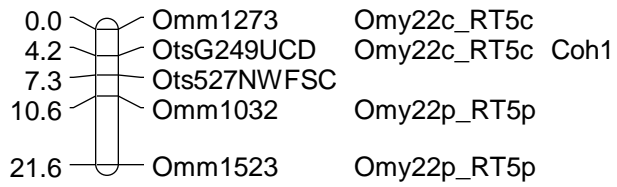

## Ck22

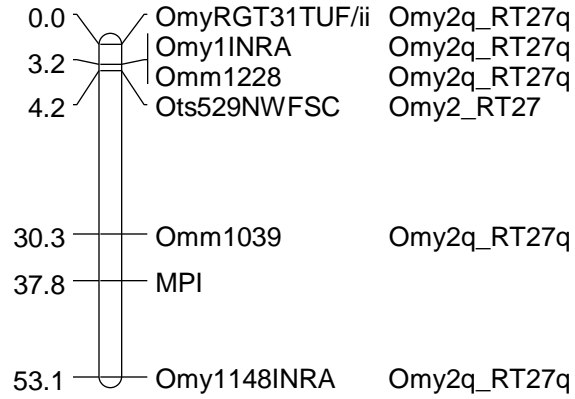

### Ck23

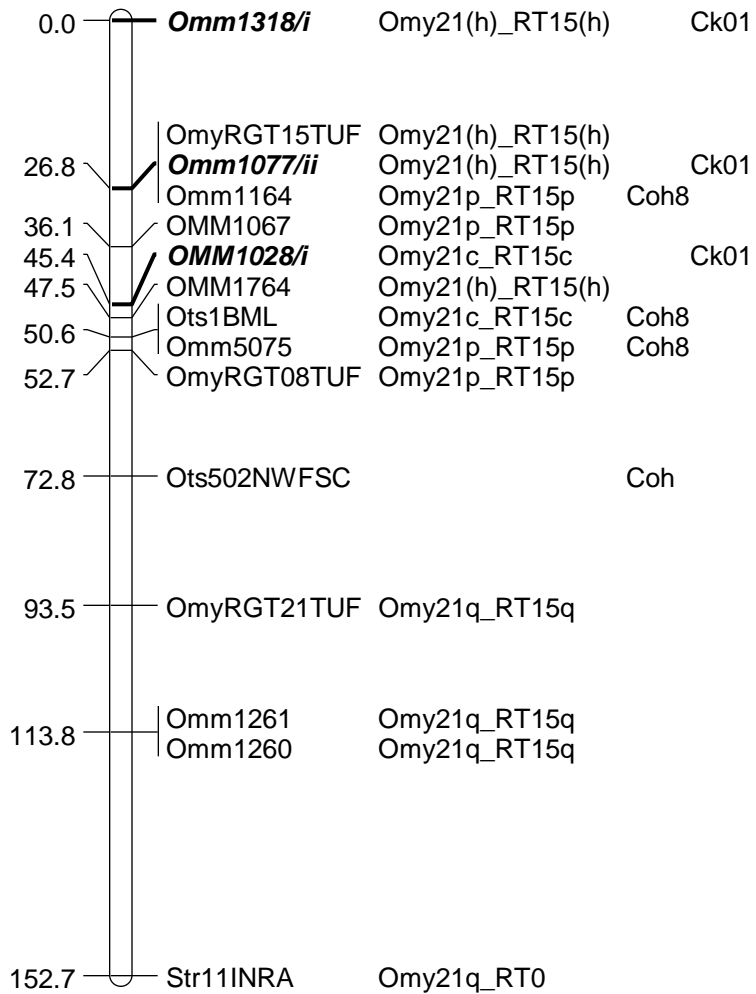

### Ck24

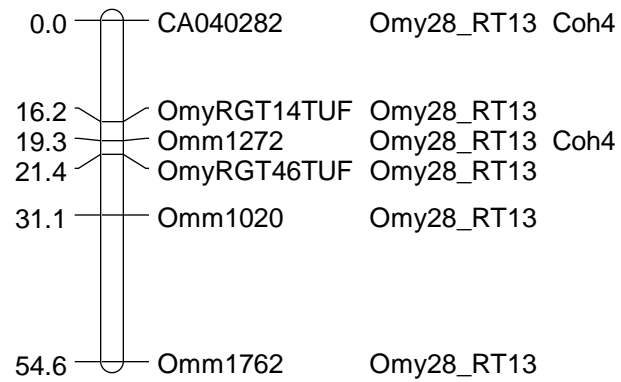

## Ck25

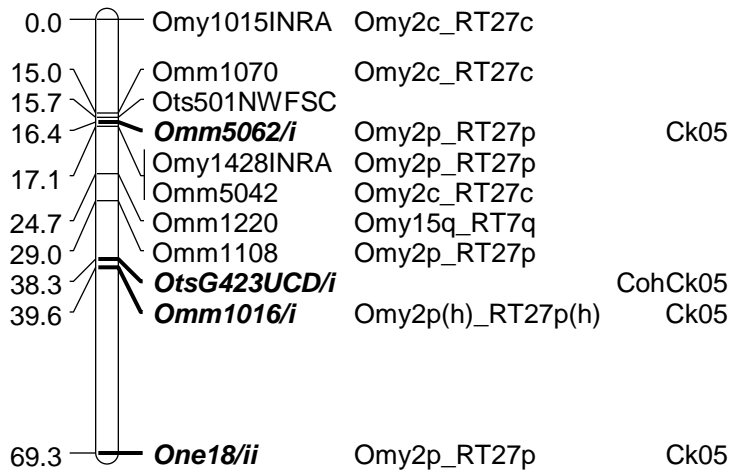

## Ck26

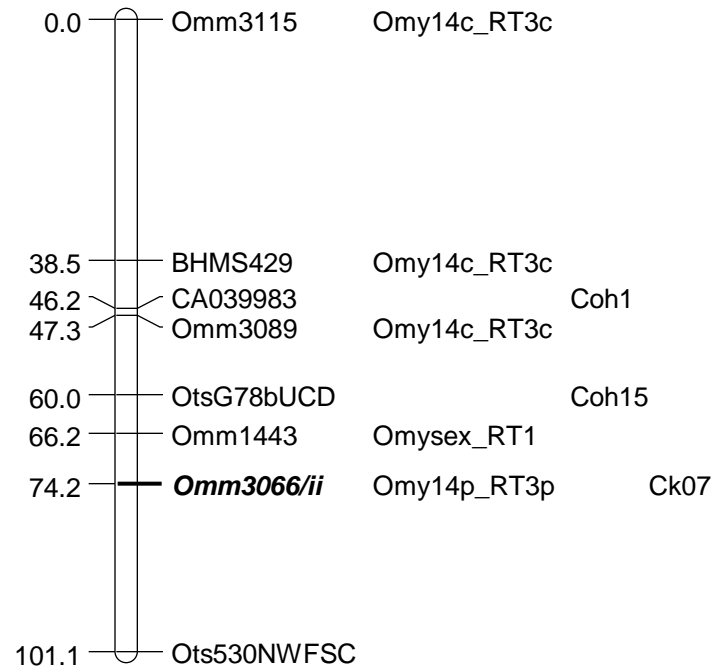

### Ck27

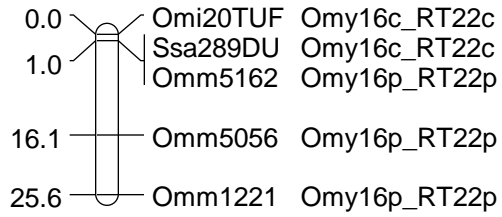

### Ck28

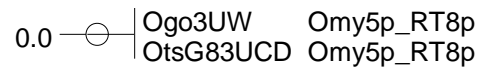

### Ck29

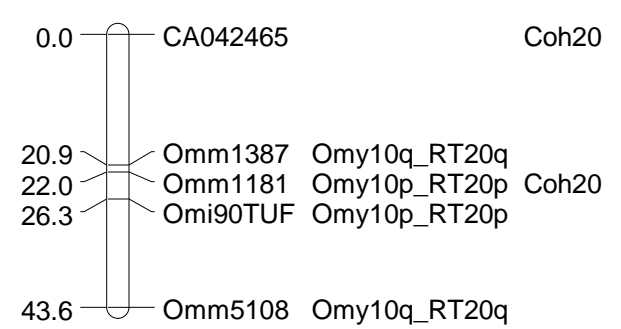

### Ck30

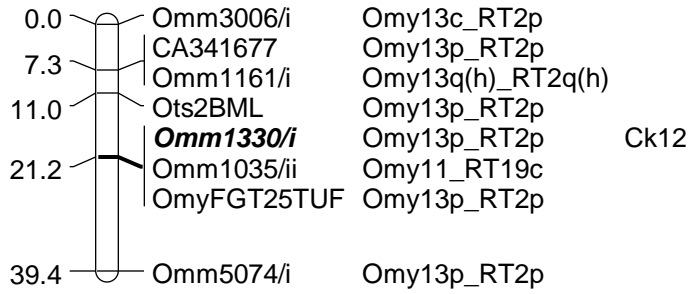

### CkF31

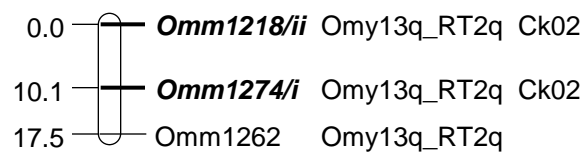

### CkM31

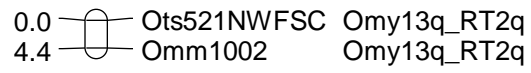

### Ck32

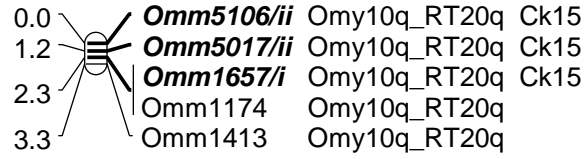



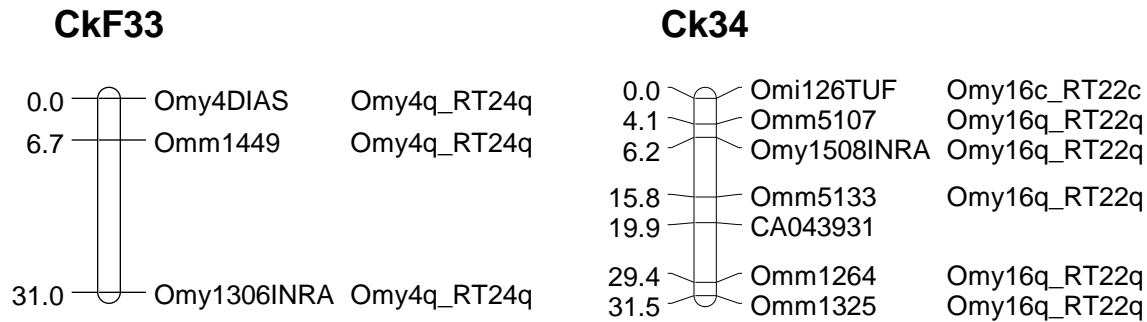

**Figure S1** Graphic representation of linkage groups mapped in Chinook salmon. The map is a consensus of marker order and distances between the female and male parents. Recombination distances are in centiMorgan (Kosambi). Loci are annotated with the chromosome (Omy) or linkage group (RT) assignment in rainbow trout. Rainbow trout chromosome arms (p or q) or centromere positions (c) are identified where possible. Markers that mapped to the homoelog in rainbow trout are designated (h). Duplicated loci (bold) are identified as/i or /ii and annotated with the homeologous Chinook linkage groups where both loci are mapped.
